# Supplementary material for: Accuracy of somatic variant detection workflows for whole genome sequencing experiments
Source: bioRxiv or medRxiv preprint supplement (doi:10.1101/2021.06.10.446467), 2021-06-14
Supplement: Supplementary file [file media-1.pdf]

# Supplement Plots

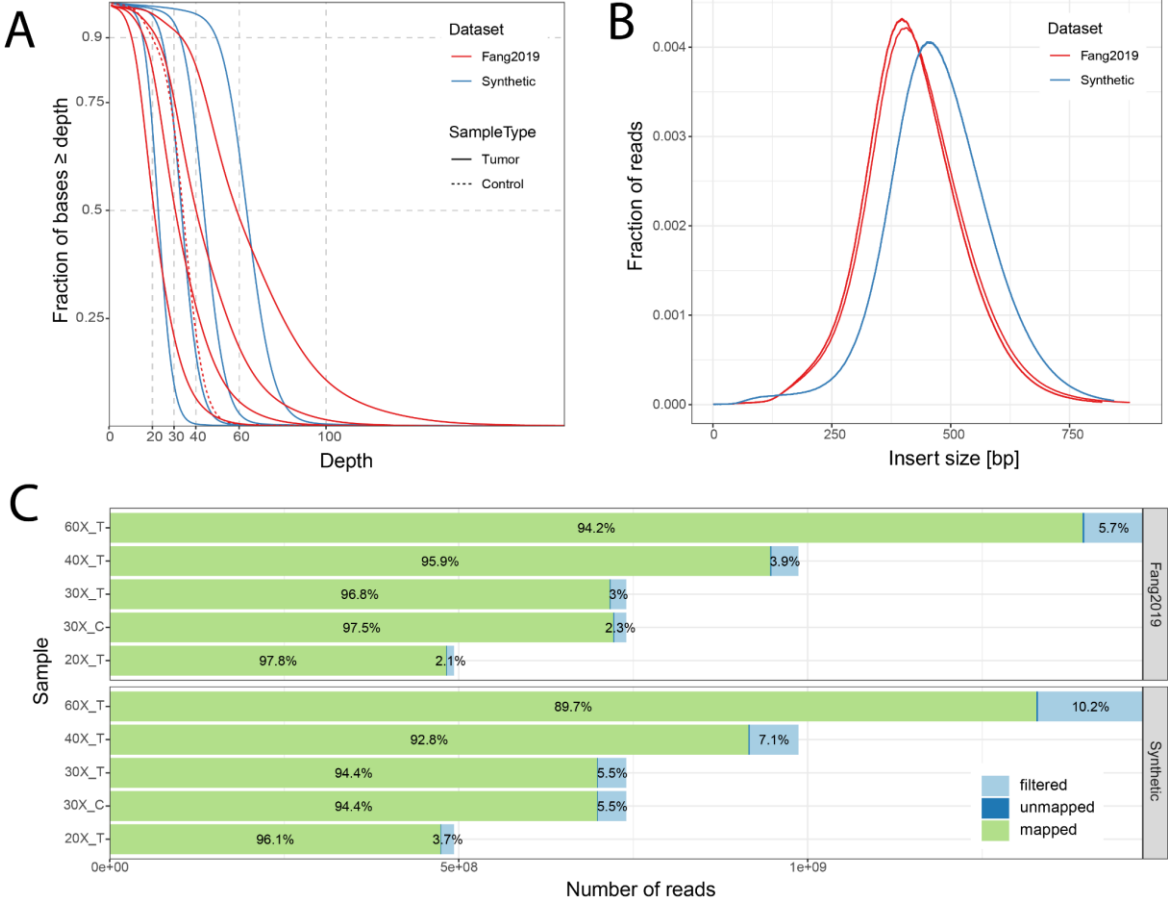

**Fig. S1:** Quality control statistics obtained for both datasets: **A)** fraction of genomic positions with coverage above specific threshold; **B)** Insert size distribution of individual samples from both utilized datasets; **C)** Read mapping and filtering statistics; the filtered group of reads includes low quality reads and duplicates. T and C suffixes in the sample names mark the tumor and control samples respectively.
